# Supplementary material for: Caspase inhibition impaired the neural stem/progenitor cell response after cortical ischemia in mice
Source: PubMed Central journal article supplement (PMC4823032; doi:10.18632/oncotarget.6803), 2015-12-30
Supplement: oncotarget-07-2239-s001.pdf [file oncotarget-07-2239-s001.pdf]

# Caspase inhibition impaired the neural stem/progenitor cell response after cortical ischemia in mice

## Supplementary Material

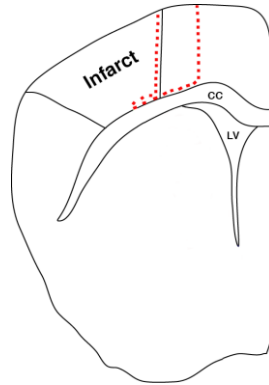

## Supplementary figure 1

The dotted area displays the area of histological analysis.
